# Supplementary material for: Variant to function mapping at single-cell resolution through network propagation
Source: PubMed Central journal article supplement (PMC8811900; doi:10.1101/2022.01.23.477426), 2022-01-24
Supplement: NIHPP2022.01.23.477426v1-supplement-1.pdf [file NIHPP2022.01.23.477426v1-supplement-1.pdf]

## **SUPPLEMENTARY TABLES**

**Supplementary Table 1: SCAVENGE analysis of monocyte count with 10X PBMC scATAC-seq dataset.**

**Supplementary Table 2: SCAVENGE analysis of 22 blood cell traits with Hematopoiesis scATAC-seq dataset.**

**Supplementary Table 3: SCAVENGE analysis of 22 blood cell traits with Hematopoiesis scATAC-seq 2 dataset.**

**Supplementary Table 4: Fine-mapped variants of COVID19 severity trait.**

**Supplementary Table 5: SCAVENGE analysis of COVID19 severity with COVID-19 PBMC scATAC-seq dataset.**

**Supplementary Table 6: Fine-mapped variants of the ALL risk trait.**

**Supplementary Table 7: SCAVENGE analysis of ALL risk predispositions with Hematopoiesis scATAC-seq 2 dataset.**
